# Supplementary material for: Pronounced Postmating Response in the Drosophila Female Reproductive Tract Fluid Proteome
Source: PubMed Central journal article supplement (PMC9357439; doi:10.1016/j.mcpro.2021.100156), 2021-09-29

**Fig. S2**

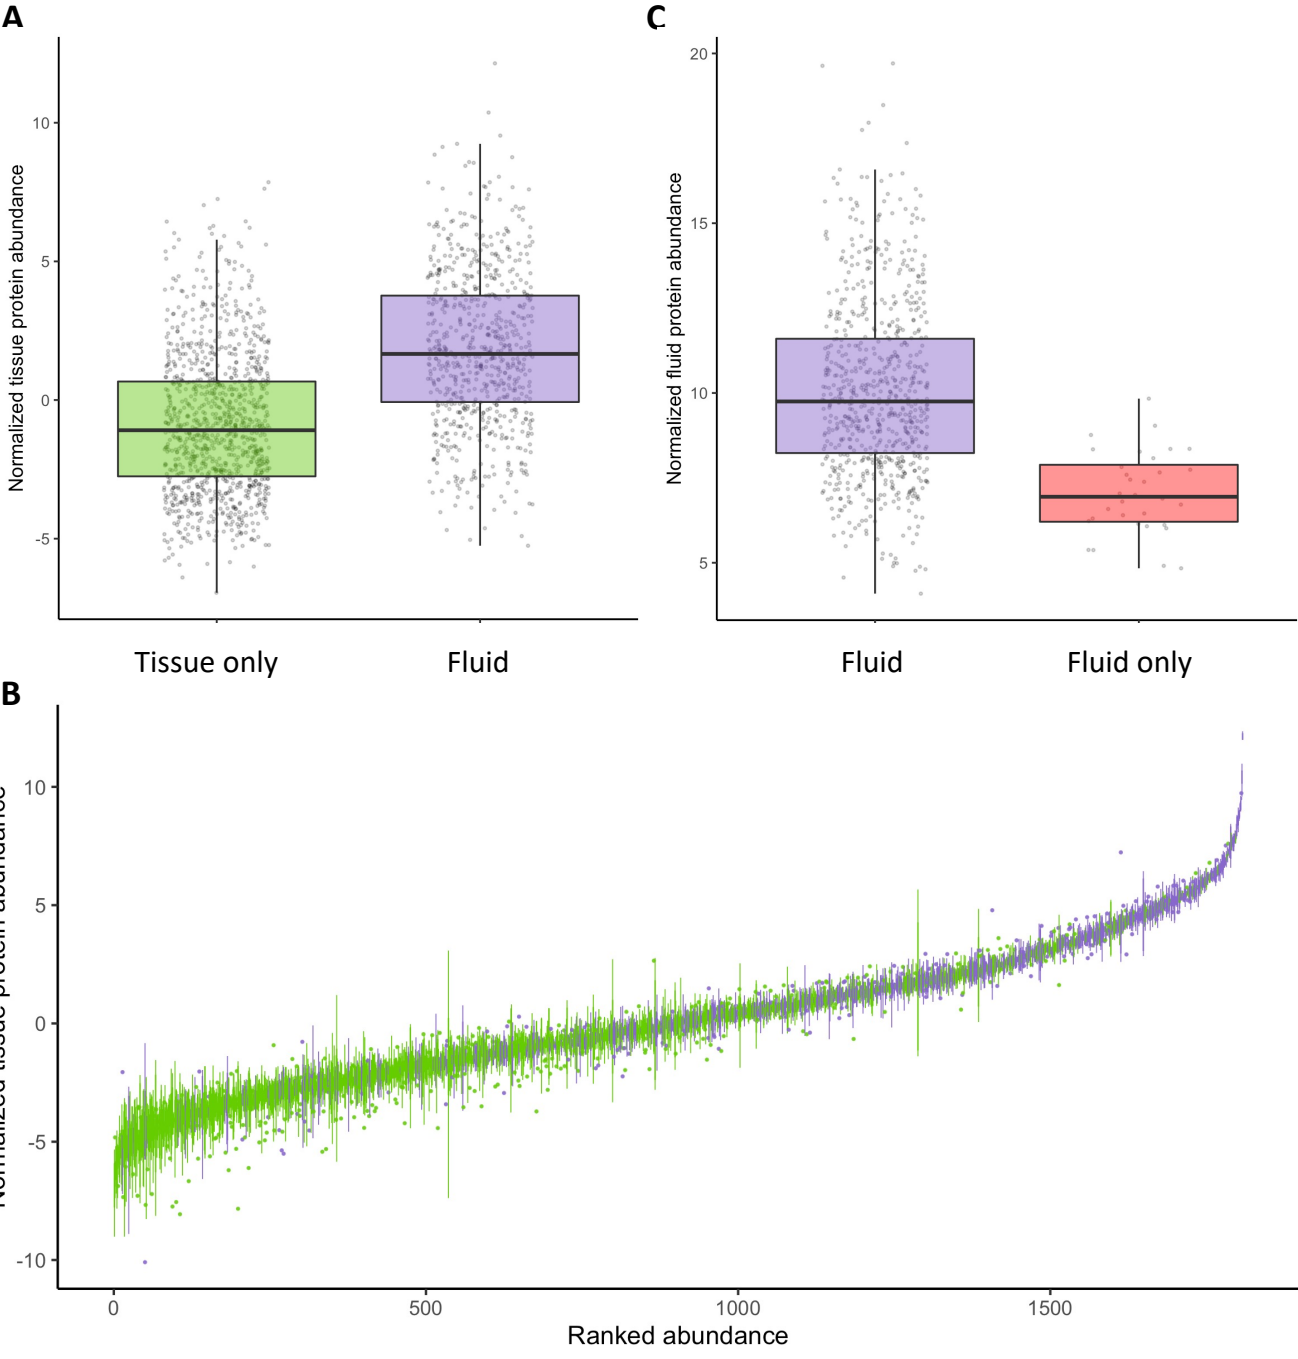

Supplement: mmc6.pdf [file mmc6.pdf]
